# Supplementary material for: Mimicking nature's strategies for the design of nanocatalysts
Source: Royal Society of Chemistry journal article supplement (doi:10.1039/c1cy00350j), 2011-10-31
Supplement: c1cy00350j.pdf [file c1cy00350j.pdf]

## Supporting Information

### *Mimicking nature's strategies for the design of nanocatalysts*

Rohit Bhandari, Ryan Copping, and Marc R. Knecht

| Entry | Peptide | Peptide Sequence       | Specificity          | Particle Shape                                            | Reference   |
|-------|---------|------------------------|----------------------|-----------------------------------------------------------|-------------|
| 1     | Pd4     | TSNAVHPTLRHL           | Pd                   | Spherical nanoparticles                                   | 7b, 24      |
| 2     | A6      | TSNAVAPTLRHL           | Pd                   | Spherical nanoparticles                                   | 3a          |
| 3     | A11     | TSNAVHPTLRAL           | Pd                   | Spherical nanoparticles                                   | 3a          |
| 4     | A6,11   | TSNAVAPTLRAL           | Pd                   | Spherical nanoparticles                                   | 3a          |
| 5     | R5      | SSKKSGSYSGKSGSKRRIL    | Pd, SiO <sub>2</sub> | Spheres, 1-D Nanoribbons and Nanoparticle Networks (NPNs) | 3b, 23, 30b |
| 6     | T7      | TLTTLN                 | Pt                   | Pt Nanocubes                                              | 22a         |
| 7     | S7      | SSFPEPD                | Pt                   | Pt Nanotetrahedrons                                       | 22a         |
| 8     | BP7A    | TLHVSSY                | Pt                   | Pt Bipods, Tripods and Tetrapods                          | 22b         |
| 9     | A3      | AYSSGAPPMPFF           | Au                   | Peptide coated Spherical nanoparticles                    | 13          |
| 10    | FigA3   | DYKDDDDKPAYSSGAPPMPFF  | Au and Pd            | Spherical nanoparticles                                   | 7d          |
| 11    | FigA3C  | DYKDDDDKPAYSSGAPPMPFFC | CdS and Pt           | Spheroidal nanoparticles                                  | 7c          |

**Table S1.** Materials-directing peptides discussed in the perspective and their target materials
